# Supplementary material for: IDO+ Endothelial Cells in Glomeruli of Kidney Transplantation Patients With Glomerulitis
Source: PubMed Central journal article supplement — Transplant Direct. 2024 Jul 5;10(8):e1674. doi: 10.1097/TXD.0000000000001674 (PMC11230740; doi:10.1097/txd.0000000000001674), 2024-07-05
Supplement: txd-10-e1674-s001.pdf [file txd-10-e1674-s001.pdf]

| Target     | Clone        | Metal  | Incub. Time | Temp | Dilution | Company       |
|------------|--------------|--------|-------------|------|----------|---------------|
| Keratin    | AE1/AE3      | 106Pd  | 5h          | RT   | 50       | Biologend     |
| Keratin    | C11          | 106Pd  | Overnight   | 4C   | 50       | cst           |
| HLA-DR     | TAL 1B5      | 141 Pr | 5h          | RT   | 100      | thermo        |
| CD20       | H1           | 142 Nd | Overnight   | 4C   | 100      | BD bioscience |
| CD68       | D4B9C        | 143 Nd | Overnight   | 4C   | 100      | cst           |
| CD11b      | D6X1N        | 144 Nd | 5h          | RT   | 100      | cst           |
| CD4        | EPR6855      | 145 Nd | Indirect    | 4C   | 50       | Abcam         |
| CD8a       | D8A8Y        | 146 Nd | 5h          | RT   | 50       | cst           |
| CD31       | 89C2         | 147 Sm | Overnight   | 4C   | 100      | cst           |
| CD73       | D7F9A        | 148 Nd | 5h          | RT   | 50       | cst           |
| Collagen I | EPR7785      | 149Sm  | Overnight   | 4C   | 100      | abcam         |
| Granzyme B | D6E9W        | 150 Nd | 5h          | RT   | 100      | cst           |
| C1q        | C1QA/2956    | 151 Eu | Overnight   | RT   | 50       | Abcam         |
| Ki-67      | 8D5          | 152 Sm | Overnight   | 4C   | 100      | cst           |
| CD3        | EP449E       | 153 Eu | Overnight   | 4C   | 50       | abcam         |
| CD66b      | G10F5        | 154 Sm | Overnight   | 4C   | 100      | biologend     |
| CD141      | E7Y9P        | 155 Gd | Overnight   | 4C   | 50       | cst           |
| CD123      | ab268196     | 156 Gd | Overnight   | 4C   | 50       | abcam         |
| CD1c       | EPR23189-196 | 157 Gd | Overnight   | 4C   | 50       | abcam         |
| Vista      | D1L2G        | 158 Gd | 5h          | RT   | 100      | abcam         |
| FOXP3      | D608R        | 159 Tb | Overnight   | 4C   | 50       | cst           |
| Tbet       | 4B10         | 160 Gd | Overnight   | 4C   | 50       | abcam         |
| CD16       | D1N9L        | 161 Dy | Overnight   | 4C   | 100      | cst           |
| IDO        | D5J4E(TM)    | 162 Dy | Overnight   | 4C   | 100      | cst           |
| CD14       | D7A2T        | 163 Dy | 5h          | RT   | 100      | cst           |
| CD204      | J5HTR3       | 164 Dy | 5h          | RT   | 50       | Thermo        |
| CD45RO     | UCHL1        | 165 Ho | Overnight   | 4C   | 100      | cst           |
| D2-40      | D2-40        | 166 Er | Overnight   | 4C   | 100      | biologend     |
| CD56       | E7X9M        | 167 Er | 5h          | RT   | 100      | cst           |
| CD103      | EPR4166(2)   | 168 Er | 5h          | RT   | 50       | abcam         |
| CD38       | EPR4106      | 169 Tm | Overnight   | 4C   | 100      | abcam         |
| CD45RA     | HI100        | 170 Er | 5h          | RT   | 100      | abcam         |
| CD15       | BRA-4F1      | 171 Yb | Overnight   | 4C   | 100      | abcam         |
| CD1a       | EP3622       | 172 Yb | Overnight   | 4C   | 100      | Thermo        |
| CD163      | EPR14643-36  | 173 Yb | 5h          | RT   | 50       | abcam         |
| CD7        | EPR4242      | 174 Yb | 5h          | RT   | 100      | abcam         |
| CD45       | D9M8I        | 175 Lu | 5h          | RT   | 50       | cst           |
| CD11c      | EP1347Y      | 176 Yb | 5h          | RT   | 100      | abcam         |
| Vimentin   | D21H3        | 194 Pt | Overnight   | 4C   | 50       | cst           |
| HLA-G      | MEM-G/2      | 198 Pt | Overnight   | 4C   | 50       | exbio         |
| a-SMA      | D4K9N        | 209bi  | 5h          | RT   | 100      | cst           |
| B catenin  | D10A8        | 89Y    | Overnight   | 4C   | 100      | cst           |

Table S1. **Antibodies used in IMC.**

| TRITON                                               | 1012<br>Glomeru<br>litis <sup>-</sup><br>24w<br>Protocol | 1016<br>Glomeru<br>litis <sup>-</sup><br>24w<br>Protocol | 1055<br>Glomeru<br>litis <sup>-</sup><br>24w<br>Protocol | 1057<br>Glomeru<br>litis <sup>-</sup><br>24w<br>Protocol | 1068<br>Glomeru<br>litis <sup>-</sup><br>24w<br>Protocol | 1003<br>Glomeru<br>litis <sup>+</sup><br>24w<br>Protocol | 1004<br>Glomeru<br>litis <sup>+</sup><br>24w<br>Protocol | 1005<br>Glomeru<br>litis <sup>+</sup><br>5y<br>Indicatio<br>n               | 1006<br>Glomeru<br>litis <sup>+</sup><br>24w<br>Protocol | 1065<br>Glomeru<br>litis <sup>+</sup><br>24w<br>Protocol | 1013<br>Glomeru<br>litis <sup>+</sup><br>24w<br>Protocol | GLT1<br>Glomeru<br>litis <sup>+</sup><br>Indicatio<br>n | GLT2<br>Glomeru<br>litis <sup>+</sup><br>Indicatio<br>n | GLT3<br>Glomeru<br>litis <sup>+</sup><br>Indicatio<br>n | GLT4<br>Glomeru<br>litis <sup>+</sup><br>Indicatio<br>n |
|------------------------------------------------------|----------------------------------------------------------|----------------------------------------------------------|----------------------------------------------------------|----------------------------------------------------------|----------------------------------------------------------|----------------------------------------------------------|----------------------------------------------------------|-----------------------------------------------------------------------------|----------------------------------------------------------|----------------------------------------------------------|----------------------------------------------------------|---------------------------------------------------------|---------------------------------------------------------|---------------------------------------------------------|---------------------------------------------------------|
| Number of glomeruli                                  | 7                                                        | 18                                                       | 66                                                       | 13                                                       | 11                                                       | 17                                                       | 29                                                       | 41                                                                          | 30                                                       | 13                                                       | 25                                                       | 49                                                      | 47                                                      | 30                                                      | 25                                                      |
| Number of sclerosed glomeruli                        | 0                                                        | 0                                                        | 0                                                        | 1                                                        | 1                                                        | 1                                                        | 1                                                        | 3                                                                           | 0                                                        | 1                                                        | 0                                                        | 14                                                      | 6                                                       | 0                                                       | 0                                                       |
| Focale segmentale glomerulosclerose (FSGS)           | -                                                        | -                                                        | -                                                        | -                                                        | -                                                        | +                                                        | -                                                        | +                                                                           | -                                                        | -                                                        | -                                                        | NP                                                      | NP                                                      | NP                                                      | NP                                                      |
| Mesangiocapillary glomerulonephritis                 | -                                                        | -                                                        | -                                                        | -                                                        | -                                                        | -                                                        | -                                                        | -                                                                           | -                                                        | -                                                        | -                                                        | NP                                                      | NP                                                      | NP                                                      | NP                                                      |
| Crescents                                            | -                                                        | -                                                        | -                                                        | -                                                        | -                                                        | -                                                        | -                                                        | -                                                                           | -                                                        | -                                                        | -                                                        | NP                                                      | NP                                                      | NP                                                      | NP                                                      |
| Thrombotic microangiopathy                           | -                                                        | -                                                        | -                                                        | -                                                        | -                                                        | -                                                        | -                                                        | -                                                                           | -                                                        | -                                                        | -                                                        | NP                                                      | NP                                                      | NP                                                      | NP                                                      |
| Acute tubular necrosis or acute tubular injury       | -                                                        | -                                                        | +                                                        | -                                                        | -                                                        | -                                                        | -                                                        | -                                                                           | -                                                        | -                                                        | -                                                        | NP                                                      | NP                                                      | NP                                                      | NP                                                      |
| <b>Glomerulitis (Banff g-score)</b>                  | <b>0</b>                                                 | <b>0</b>                                                 | <b>0</b>                                                 | <b>0</b>                                                 | <b>0</b>                                                 | <b>1</b>                                                 | <b>3</b>                                                 | <b>3</b>                                                                    | <b>3</b>                                                 | <b>2</b>                                                 | <b>1</b>                                                 | <b>2</b>                                                | <b>3</b>                                                | <b>3</b>                                                | <b>2</b>                                                |
| Transplant glomerulopathy (Banff cg-score)           | 0                                                        | 0                                                        | 0                                                        | 0                                                        | 0                                                        | 0                                                        | 0                                                        | 2                                                                           | 0                                                        | 0                                                        | 0                                                        | 3                                                       | 3                                                       | 0                                                       | 0                                                       |
| Mesangial matrix increase (Banff mm-score)           | 0                                                        | 0                                                        | 0                                                        | 0                                                        | 0                                                        | 0                                                        | 0                                                        | 0                                                                           | 0                                                        | 0                                                        | 0                                                        | 2                                                       | 1                                                       | 0                                                       | 0                                                       |
| Interstitial inflammation (Banff i-score)            | 0                                                        | 0                                                        | 0                                                        | 0                                                        | 0                                                        | 3                                                        | 0                                                        | 1                                                                           | 1                                                        | 0                                                        | 0                                                        | 1                                                       | 1                                                       | 1                                                       | 2                                                       |
| Tubulitis (Banff t-score)                            | 0                                                        | 0                                                        | 0                                                        | 0                                                        | 0                                                        | 2                                                        | 0                                                        | 1                                                                           | 1                                                        | 0                                                        | 0                                                        | 2                                                       | 1                                                       | 1                                                       | 2                                                       |
| Total inflammation                                   | 0%                                                       | 0%                                                       | 0%                                                       | 0%                                                       | 0%                                                       | 60%                                                      | 10%                                                      | 20%                                                                         | 10%                                                      | 10%                                                      | 0%                                                       | >50%                                                    | >50%                                                    | 10-25%                                                  | 26-50%                                                  |
| Interstitial fibrosis and tubular atrophy            | 0%                                                       | 10%                                                      | 30%                                                      | 0%                                                       | 0%                                                       | 10%                                                      | 10%                                                      | 20%                                                                         | 0%                                                       | 10%                                                      | 0%                                                       | 26-50%                                                  | 26-50%                                                  | <10%                                                    | <10%                                                    |
| Inflammation in sclerosed areas (Banff i-IFTA-score) | 0                                                        | 0                                                        | 0                                                        | 0                                                        | 1                                                        | 3                                                        | 1                                                        | 3                                                                           | 0                                                        | 2                                                        | 0                                                        | 3                                                       | 3                                                       | 0                                                       | 0                                                       |
| <b>Peritubular capillaritis (Banff ptc-score)</b>    | <b>0</b>                                                 | <b>0</b>                                                 | <b>0</b>                                                 | <b>0</b>                                                 | <b>0</b>                                                 | <b>0</b>                                                 | <b>1</b>                                                 | <b>2</b>                                                                    | <b>2</b>                                                 | <b>0</b>                                                 | <b>0</b>                                                 | <b>2</b>                                                | <b>3</b>                                                | <b>3</b>                                                | <b>1</b>                                                |
| Arteriitis/endothelialitis (Banff v-score)           | 0                                                        | 0                                                        | 0                                                        | 0                                                        | 0                                                        | 0                                                        | 0                                                        | 0                                                                           | 0                                                        | 0                                                        | 0                                                        | 0                                                       | 0                                                       | 0                                                       | 0                                                       |
| Vascular intima fibrosis (Banff cv-score)            | 1                                                        | 1                                                        | 0                                                        | 0                                                        | 1                                                        | 0                                                        | 1                                                        | 1                                                                           | 1                                                        | 0                                                        | 1                                                        | 2                                                       | 2                                                       | 0                                                       | 2                                                       |
| Arteriolar hyalinosis (Banff ah-score)               | 0                                                        | 0                                                        | 0                                                        | 0                                                        | 1                                                        | 1                                                        | 2                                                        | 0                                                                           | 0                                                        | 3                                                        | 0                                                        | 2                                                       | 2                                                       | 0                                                       | 0                                                       |
| C4d staining on biopsy                               | NP                                                       | NP                                                       | NP                                                       | NP                                                       | NP                                                       | +                                                        | -                                                        | +                                                                           | -                                                        | -                                                        | -                                                        | +                                                       | +                                                       | +                                                       | +                                                       |
| BK staining on biopsy                                | NP                                                       | NP                                                       | NP                                                       | NP                                                       | NP                                                       | -                                                        | NP                                                       | -                                                                           | NP                                                       | NP                                                       | NP                                                       | NP                                                      | NP                                                      | NP                                                      | NP                                                      |
| CMV staining on biopsy                               | NP                                                                          | -                                                        | NP                                                       | NP                                                       | NP                                                      | NP                                                      | NP                                                      | NP                                                      |
| Diagnosis                                            | Normal biopsy or nonspecific changes                     | IFTA Grade I                                             | IFTA Grade II                                            | Normal biopsy or nonspecific changes                     | Normal biopsy or nonspecific changes                     | Active ABMR                                              | Active ABMR / Acute TCMR IA                              | Chronic Active ABMR / Suspicious (Borderline) for Acute TCMR / IFTA Grade I | Active ABMR                                              | CNI toxicity                                             | Normal biopsy or nonspecific changes                     | Chronic Active AMR/ Chronic Active TCMR IA              | Chronic Active AMR                                      | Active AMR / Suspicious (Borderline) for Acute TCMR     | Active AMR / Acute TCMR IA                              |

Table S2. Banff scores.

|                                 | Age | Sex | MSC/<br>Control | HLA-<br>A/B/DR<br>mismatch | KIR<br>ligand<br>mismatch | DSA<br>at biopsy<br>timepoint | Virus RT-PCR<br>at biopsy<br>timepoint log<br>c/mL |
|---------------------------------|-----|-----|-----------------|----------------------------|---------------------------|-------------------------------|----------------------------------------------------|
| <b>Glomerulitis<sup>-</sup></b> |     |     |                 |                            |                           |                               |                                                    |
| 1057                            | 48  | m   | Control         | 1/0/1                      | No                        | No                            | BK, det. load                                      |
| 1012                            | 63  | m   | MSC             | 2/1/2                      | C2                        | No                            | No                                                 |
| 1068                            | 64  | m   | Control         |                            | Bw4                       | No                            | No                                                 |
| 1016                            | 57  | v   | control         | 2/1/2                      | No                        | No                            | No                                                 |
| 1055                            | 57  | m   | control         | 2/2/2                      | No                        | No                            | No                                                 |
| <b>Glomerulitis<sup>+</sup></b> |     |     |                 |                            |                           |                               |                                                    |
| 1003                            | 69  | m   | MSC             | 2/2/2                      | C2                        | Yes                           | No                                                 |
| 1004                            | 54  | v   | MSC             | 2/2/2                      | No                        | Yes                           | No                                                 |
| 1005                            | 49  | m   | Control         | 2/1/1                      | No                        | No                            | BK= 0                                              |
| 1006                            | 66  | m   | MSC             | 0/2/2                      | Bw4 & C2                  | Yes                           | No                                                 |
| 1013                            | 53  | m   | Control         | 2/2/2                      | No                        | No                            | No                                                 |
| 1065                            | 54  | v   | Control         | 1/0/0                      | No                        | No                            | BK= 2.6                                            |
| GLT1                            | -   | -   | Indication      | -                          | -                         | -                             | -                                                  |
| GLT2                            | -   | -   | Indication      | -                          | -                         | -                             | -                                                  |
| GLT3                            | -   | -   | Indication      | -                          | -                         | -                             | -                                                  |
| GTL4                            | -   | -   | Indication      | -                          | -                         | -                             | -                                                  |

Table S3. **Clinical parameters of the patients.**

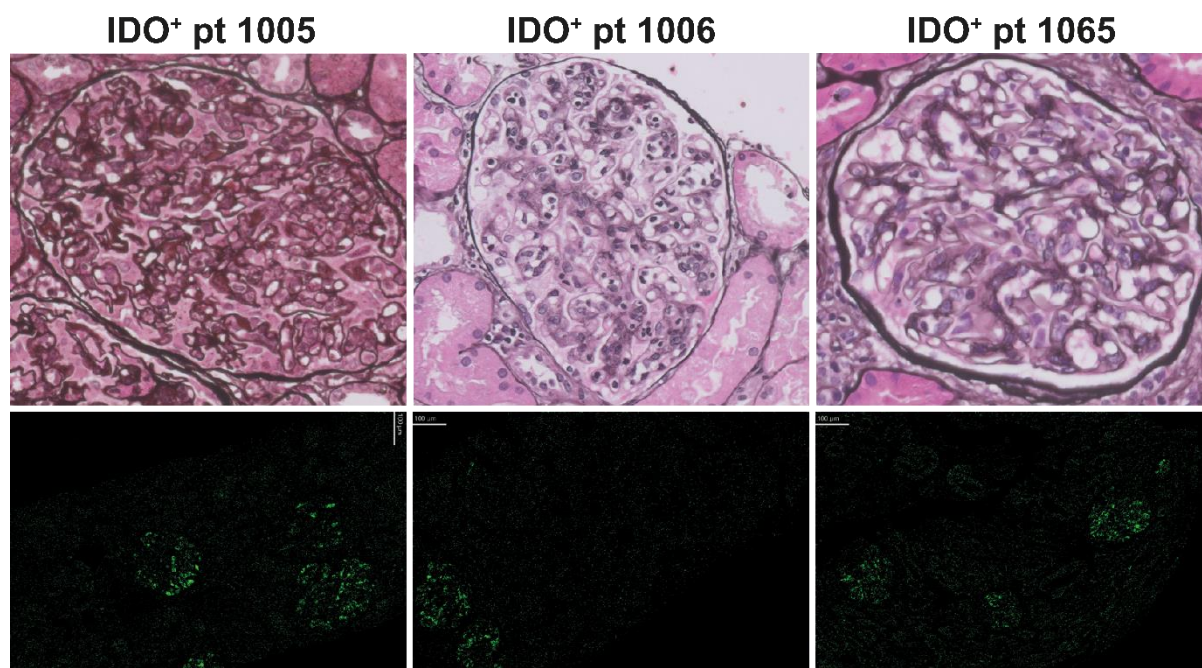

Figure S1. **H&E stains and IDO+ stains of patient 1005, 1006 and 1065.** Top panel shows H&E stains of the three patients with IDO+ glomeruli. Bottom panel shows IDO staining in IMC images of these three patients.

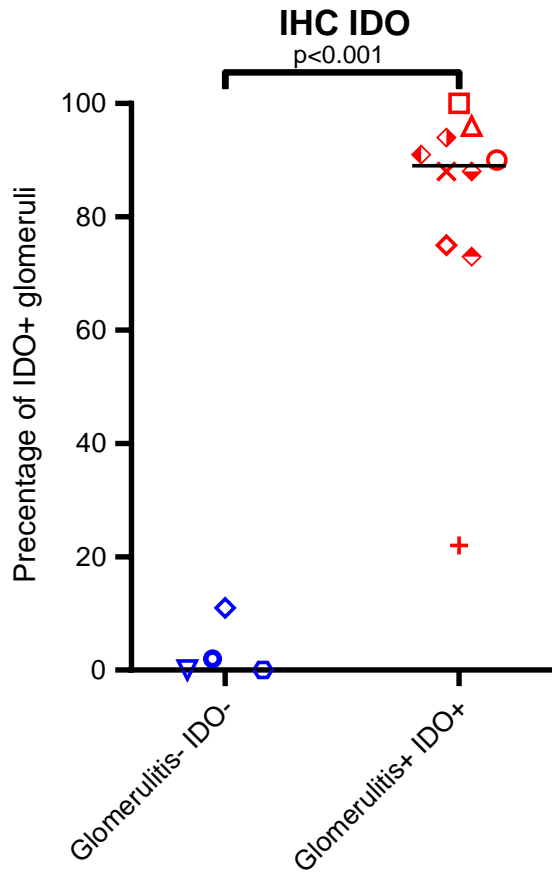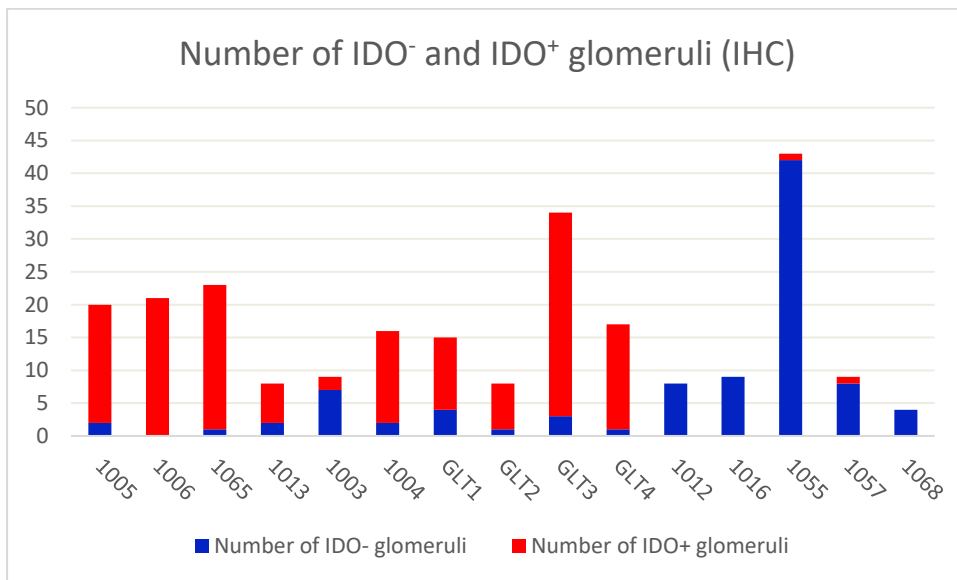

Figure S2. **IHC stains of IDO**. Upper panel shows the percentage of IDO+ glomeruli in glomerulitis- and glomerulitis+ biopsies. Bottom panel shows the number of IDO- and IDO+ glomeruli counted in each biopsy.
